# Supplementary material
Source: publisher figshare collection journal article supplement (https://asha.figshare.com/articles/dataset/_/19528978)
Supplement: Supplementary file 1 [file 1]

**Supplemental Material S1.** The parent fidelity of implementation 20-item rating scale for DB-PCX sessions.

| Phase 1: Prevention                           |                                                                                                                                                                                                                                         |                                                                                                                                                                                                                                                                                                                                                                                                                                      |                    |
|-----------------------------------------------|-----------------------------------------------------------------------------------------------------------------------------------------------------------------------------------------------------------------------------------------|--------------------------------------------------------------------------------------------------------------------------------------------------------------------------------------------------------------------------------------------------------------------------------------------------------------------------------------------------------------------------------------------------------------------------------------|--------------------|
| Strategy                                      | Definition                                                                                                                                                                                                                              | Criteria                                                                                                                                                                                                                                                                                                                                                                                                                             | Score<br>(0, 1, 2) |
| Changing the Environment                      | <ul style="list-style-type: none"> <li>Address setting events</li> <li>Change the order of events</li> <li>Avoid situations or people</li> <li>Controlling the environment</li> </ul>                                                   | <p><u>Score of 2</u> = 3+ instances of implementation</p> <p><u>Score of 1</u> = 1-2 instances of implementation</p>                                                                                                                                                                                                                                                                                                                 |                    |
| Parent Style                                  | <ul style="list-style-type: none"> <li>Do things in small doses or steps</li> <li>Respond to early signs of the problem</li> <li>Change how you ask or respond (avoiding use of the word “No”)</li> <li>Provision of choices</li> </ul> | <p><u>Score of 2</u> = If parent offers choices at least twice <b>AND</b> avoids use of word “No” throughout MCX (i.e., no more than 2 instances of “No”)</p> <p><u>Score of 2</u> = parent provides 3+ CLEAR choices <b>AND</b> uses no more than 3 instances of “no”</p> <p><u>Score of 1</u> = Parent offers 1 high quality choice <b>AND</b> avoids use of word “No” throughout MCX (i.e., no more than 2 instances of “No”)</p> |                    |
| Auditory Cues<br>(Frequency)                  | Use of auditory cues including: <ul style="list-style-type: none"> <li>3-2-1 countdown</li> <li>Clean-up song</li> <li>First-Then phrase</li> <li>Timer cue with verbal reference to timer</li> </ul>                                   | <p><u>Score of 2</u> = 3 clear instances of any auditory cue</p> <p><u>Score of 1</u> = 2 clear instances of any auditory cue</p> <p>OR</p> <p>4 <i>attempts</i> at first-then phrases (e.g., “After we clean-up we can have snack.”)</p>                                                                                                                                                                                            |                    |
| Visual Schedule/Cues<br>(Frequency)           | Implementation of visual schedule/First-Then board within and/or across activities                                                                                                                                                      | <p><u>Score of 2</u> = 3 clear instances of visual cue use. If using visual schedule, this should include one reference to the visual schedule at outset of activity (or recording).</p> <p><u>Score of 1</u> = 1 clear instance of use</p>                                                                                                                                                                                          |                    |
| Visual Schedule/Cues<br>(Quality of Majority) | <ul style="list-style-type: none"> <li>Adherence to RUBI sequence of implementing visual schedule/First-Then board</li> <li>Use of high-quality visual cue as part of auditory cue (ex., verbal countdown with visual cue)</li> </ul>   | <p><u>Score of 2</u> = 50+% of instances of visual cue use are high quality (i.e., include at least 3 of the following elements: appropriate timing, simple language, child attention, child involvement)</p> <p><u>Score of 1</u> = &lt; 50% of instances of visual cue use are high quality</p>                                                                                                                                    |                    |

| Phase 2: Reinforcement                                                 |                                                                                                                                                                                                                                                                                                                                                                                                                                                                                                                                                   |                                                                                                                                                                                                                                                                                                                                                                                                                                                                                                                                                                                                                          |                    |
|------------------------------------------------------------------------|---------------------------------------------------------------------------------------------------------------------------------------------------------------------------------------------------------------------------------------------------------------------------------------------------------------------------------------------------------------------------------------------------------------------------------------------------------------------------------------------------------------------------------------------------|--------------------------------------------------------------------------------------------------------------------------------------------------------------------------------------------------------------------------------------------------------------------------------------------------------------------------------------------------------------------------------------------------------------------------------------------------------------------------------------------------------------------------------------------------------------------------------------------------------------------------|--------------------|
| Strategy                                                               | Definition                                                                                                                                                                                                                                                                                                                                                                                                                                                                                                                                        | Criteria                                                                                                                                                                                                                                                                                                                                                                                                                                                                                                                                                                                                                 | Score<br>(0, 1, 2) |
| Specificity of Reinforcers (Structured)                                | In a structured task (activity in which parent places a demand on the child immediately <i>before</i> a behavior is expected), the parent uses reinforcers (tangible <i>and/or</i> social) that are appropriate given the task demands and child behavior.                                                                                                                                                                                                                                                                                        | <u>Score of 2</u> = 3+ instances of specific praise/reinforcement<br><br><u>Score of 1</u> = 1-2 instances of <i>high quality, specific</i> praise                                                                                                                                                                                                                                                                                                                                                                                                                                                                       |                    |
| Specificity of Reinforcers (“Catch your child being good”)             | When parent “catches child being good” (outside of the context of the child meeting specific demands placed on him/her by parent immediately prior to the behavior), parent uses reinforcers (tangible <i>and/or</i> social) that are appropriate given task demands & child behavior.<br><br>General praise is not ever credited for <i>Specificity of Reinforcer</i> items.                                                                                                                                                                     | <u>Score of 2</u> = 3+ instances<br><br><u>Score of 1</u> = 1-2 instances of <i>high quality, specific</i> praise                                                                                                                                                                                                                                                                                                                                                                                                                                                                                                        |                    |
| Immediacy of Reinforcers (Structured)                                  | In “structured tasks,” parent delivers reinforcer <b>within 5 seconds</b> of a target child behavior.<br><br>General praise can be scored for timing. But parent can only receive a 1 at most if only ever using general praise.                                                                                                                                                                                                                                                                                                                  | <u>Score of 2</u> = 3+ instances of <i>specific</i> verbal praise (or specific other)<br>2 specific <u>AND</u> 3+ non-specific<br><br><u>Score of 1</u> = 3+ instances of non-specific verbal praise, delivered within 5 seconds                                                                                                                                                                                                                                                                                                                                                                                         |                    |
| Engagement in Play<br><br>(Following Child’s Lead & Imitation of Play) | <ul style="list-style-type: none"> <li>Follows child’s lead in play.</li> <li>Parent should refrain from giving instructions/commands both with regard to how to play with a toy <i>and</i> which toys to play with. Parent also refrains from asking “test questions” during play (e.g., “What color is this?”)</li> <li>Imitates child play acts.</li> </ul> <u>Engagement</u> can look like: giving choices of toys, explicitly following lead, giving space for child to take a turn after modeling, modeling proximal to child’s play level. | <u>Score of 2</u> = No more than 20% of what parent says during play is directive (vast majority of what parent says during play is <b>not</b> directive).<br><u>AND</u> <ul style="list-style-type: none"> <li>Must show SOME imitation of play</li> <li>Must maintain child <u>engagement</u> across play (majority of time, parent is engaging in a non-directive manner)</li> </ul> <u>Score of 1</u> = 21-50% of what parent says during play is directive<br><u>AND</u> <ul style="list-style-type: none"> <li>At least be attempting to keep child engaged/keep child engaged for half of play portion</li> </ul> |                    |

|                                                                                              |                                                                                                                                                                                                                                                                                                                                                                                                                                                                                               |                                                                                                                                                                                                                                                                                                                                                                                                                                                                                                                                                                                                                                                                                                                                                   |  |
|----------------------------------------------------------------------------------------------|-----------------------------------------------------------------------------------------------------------------------------------------------------------------------------------------------------------------------------------------------------------------------------------------------------------------------------------------------------------------------------------------------------------------------------------------------------------------------------------------------|---------------------------------------------------------------------------------------------------------------------------------------------------------------------------------------------------------------------------------------------------------------------------------------------------------------------------------------------------------------------------------------------------------------------------------------------------------------------------------------------------------------------------------------------------------------------------------------------------------------------------------------------------------------------------------------------------------------------------------------------------|--|
|                                                                                              |                                                                                                                                                                                                                                                                                                                                                                                                                                                                                               | Score of 0 = 50%+ of what parent says during play is directive, majority of the time engagement style is directive, no imitation.                                                                                                                                                                                                                                                                                                                                                                                                                                                                                                                                                                                                                 |  |
| Language in Play<br><br>(Describing Child’s Play & Providing Language Expansions and Models) | <p>How is the parent using language to support child’s play? When the parent <u>is</u> engaging the child appropriately, how appropriate is their language?</p> <ul style="list-style-type: none"> <li>• Describes child’s play with simple language and/or provides simple labels of objects in child’s focus.</li> <li>• Imitates (“reflects”) or expands child’s utterances during play.</li> <li>• Parent highlights own model of social or play skill with specific language.</li> </ul> | <p><i>Descriptions</i><br/> Score of 2 = Parent describes/labels at least 50% of child’s play acts with simple &amp; specific language<br/> Score of 1 = Describes/labels 20-49% OR describes high percentage with language that is not simple enough<br/> Score of 0 = Describes/labels &lt; 20%</p> <p><i>and consider:</i></p> <p><i>Expansions</i><br/> Score of 2= Within 3-5 sec parent imitates or expands 50+% of child utterances.<br/> Score of 1 = Within 3-5 sec parent imitates or expands 25%.<br/> Score of 0 = Within 3-5 sec parent imitates or expands &lt; 25%.</p> <p>Round up between the 2 components above for this item’s score. If parent meets criteria for 2 on Descriptions, and 1 on Expansions, code item as 2.</p> |  |

| Phase 3: Extinction                    |                                                                                                                                                                                                                                                    |                                                                                                                                                                                                                                                                                                                                                                                                                                                                                                    |                 |
|----------------------------------------|----------------------------------------------------------------------------------------------------------------------------------------------------------------------------------------------------------------------------------------------------|----------------------------------------------------------------------------------------------------------------------------------------------------------------------------------------------------------------------------------------------------------------------------------------------------------------------------------------------------------------------------------------------------------------------------------------------------------------------------------------------------|-----------------|
| Strategy                               | Definition                                                                                                                                                                                                                                         | Criteria                                                                                                                                                                                                                                                                                                                                                                                                                                                                                           | Score (0, 1, 2) |
| General Principles of Planned Ignoring | Parent avoids: <ul style="list-style-type: none"> <li>• Complying with child’s demand.</li> <li>• Providing verbal feedback related to/acknowledging the behavior (ex., “Stop kicking!”).</li> <li>• Avoids reactive facial expression.</li> </ul> | <p><u>Score of 2</u> = Parent avoids all 3 criteria in definition throughout MCX.</p> <p><u>Score of 1</u> = Evident to rater that parent is <i>trying</i> to implement Planned Ignoring, but implementation is not clean or comprehensive (e.g., consistent partial ignore: parent does frequently respond with flat affect, but fails to avoid eye contact throughout MCX).</p> <p>This code is about behaviors that are appropriately <i>absent</i> in parent response to child behavior.</p>   |                 |
| Planned Ignoring (Frequency)           | Planned Ignoring should be coded in response to all behaviors, include those that appear to be fleeting.                                                                                                                                           | <p>Of times that behavior occurred and parent had opportunity to Ignore, what % were ignored?</p> <p><u>Score of 2</u> = 80+ % ignored</p> <p><u>Score of 1</u> = 20 - 80% of times ignored</p>                                                                                                                                                                                                                                                                                                    |                 |
| Planned Ignoring (Quality of Majority) | <i>Of the times that parent implemented/attempted planned ignoring occurred, what was the quality of Planned Ignoring implementation (including use of appropriate type of Ignoring)?</i>                                                          | <p><u>Score of 2</u> = 80+ % of Planned Ignoring episodes were high quality</p> <p><u>Score of 1</u> = 20 - 80% of Planned Ignoring episodes was high quality</p> <p>This code is about behaviors that are <i>present</i> in parent response to child bx.</p>                                                                                                                                                                                                                                      |                 |
| Compliance (Frequency)                 | Parent gives instruction that they expect the child to be able to comply with. Parent should be being discerning about giving instructions.<br><br>Examples of Compliance Commands: sit down, clean up, etc.                                       | <p>Of the times parent is giving compliance instructions, how frequently are they (1) close to child and (2) giving clear, specific commands, only a single time? Frequency code should be based on these two features:</p> <p><u>Score of 2</u> = 50+ % of compliance commands met the two above criteria</p> <p><u>Score of 1</u> = 25 - 49% of compliance commands met the two above criteria</p>                                                                                               |                 |
| Compliance (Quality of Majority)       | Parent helps child to comply with a given compliance command and praises for compliance.                                                                                                                                                           | <p>Of the number of compliance commands parent gave throughout entire MCX (described above), what % were high quality? Quality code should be based on presence of the following two features:</p> <p>(1) Uses physical guidance to help child comply.</p> <p>(2) Provides immediate feedback/praise upon completion.</p> <p><u>Score of 2</u> = 50+ % of compliance commands met the two above criteria</p> <p><u>Score of 1</u> = 25 - 49% of compliance commands met the two above criteria</p> |                 |

| Phase 4: Teaching                       |                                                                                                                                                                                                                                                                                                                                                                                                                                  |                                                                                                                                                                                                                                                                                                                                                                                                                                                                                                                                                                                                                                                                                                                              |                 |
|-----------------------------------------|----------------------------------------------------------------------------------------------------------------------------------------------------------------------------------------------------------------------------------------------------------------------------------------------------------------------------------------------------------------------------------------------------------------------------------|------------------------------------------------------------------------------------------------------------------------------------------------------------------------------------------------------------------------------------------------------------------------------------------------------------------------------------------------------------------------------------------------------------------------------------------------------------------------------------------------------------------------------------------------------------------------------------------------------------------------------------------------------------------------------------------------------------------------------|-----------------|
| Strategy                                | Definition                                                                                                                                                                                                                                                                                                                                                                                                                       | Criteria                                                                                                                                                                                                                                                                                                                                                                                                                                                                                                                                                                                                                                                                                                                     | Score (0, 1, 2) |
| Functional Communication Implementation | Responds to early signs of a behavior by helping child to implement an appropriate replacement behavior that works quickly.                                                                                                                                                                                                                                                                                                      | <p><u>Score of 1</u> = If single OR multiple instances when it's evident to rater that parent is <i>trying</i> to implement functional comm strategy</p> <ul style="list-style-type: none"> <li><u>OR</u> single instance in which parent <b>gives praise</b>/reinforcement when child spontaneously uses functional comm to request when something is frustrating</li> </ul> <p><u>Score of 2</u> = Just a single instance of <i>high-quality</i> implementation necessary (follows through with having child say/sign and parent praises)</p> <p><u>OR</u> 2+ clear instances in which parent <b>gives praise</b>/reinforcement when child spontaneously uses functional comm to request when something is frustrating</p> |                 |
| Chaining (Frequency)                    | <p>How frequently did parent try to use chaining to teach a skill?</p> <p><i>Pre-determined chaining plan should be established by therapist with parent.</i></p> <ul style="list-style-type: none"> <li>Parent will likely only be explicitly taught to use chaining with 1 skill/behavior.</li> </ul>                                                                                                                          | <p><u>Score of 1</u> = Evident to rater that parent is <i>trying</i> to implement a chain / teach a sequence as a chain. Must include at least 3 systematic steps.</p> <ul style="list-style-type: none"> <li>If not sure about whether systematic enough for a 1, consider whether 20-49% of minimum number of steps parent should have completed as a part of Chain <u>are systematic and include increased support.</u></li> </ul> <p><u>Score of 2</u> = 50+% of minimum number of steps that parent should have completed as a part of Chain include systematic teaching and increased support. Must include &gt;3 systematic steps.</p>                                                                                |                 |
| Chaining (Quality of Majority)          | <p>Parent appropriately social and tangible reinforcers during chaining implementation.</p> <p>Reinforces immediately (within 5 sec) after child attempts new step in chaining.</p>                                                                                                                                                                                                                                              | <p><u>Score of 1</u> = 20-49% of minimum number of steps that parent should have completed as a part of Chain <i>include immediate reinforcement/praise</i></p> <p><u>Score of 2</u> = 50+% of minimum number of steps that parent should have completed as a part of Chain <i>include immediate reinforcement/praise</i></p>                                                                                                                                                                                                                                                                                                                                                                                                |                 |
| Teaching (Frequency)                    | <p>How frequently did parent use prompting to facilitate child's demonstration of a skill or behavior? Including:</p> <ul style="list-style-type: none"> <li>Modeling</li> <li>Verbal Prompt (hint, or question-as-hint, prosodic stress as cue)</li> <li>Visual Prompts (gestures, signs)</li> <li>Physical Prompts (full or partial physical prompt)</li> <li>Stimulus Prompts (cue via material or related object)</li> </ul> | <p><u>Score of 0</u> = 1-2 instances</p> <p><u>Score of 1</u> = 3-4 instances of “prompts” in context of Teaching</p> <p><u>Score of 2</u> = 5+ instances of “prompts” in context of Teaching (hand-over-hand can only be credited for 2 of 5 instances)</p>                                                                                                                                                                                                                                                                                                                                                                                                                                                                 |                 |

|                                                                                                    |                                                                                                                                                                                                                                                                                                                                                                                                                                                                                                                                                                                               |                                                                                                                                                                                                                                                                                                                                                                                                                                                                                                                                                                                                                                                   |  |
|----------------------------------------------------------------------------------------------------|-----------------------------------------------------------------------------------------------------------------------------------------------------------------------------------------------------------------------------------------------------------------------------------------------------------------------------------------------------------------------------------------------------------------------------------------------------------------------------------------------------------------------------------------------------------------------------------------------|---------------------------------------------------------------------------------------------------------------------------------------------------------------------------------------------------------------------------------------------------------------------------------------------------------------------------------------------------------------------------------------------------------------------------------------------------------------------------------------------------------------------------------------------------------------------------------------------------------------------------------------------------|--|
|                                                                                                    | <ul style="list-style-type: none"> <li>• Time Delay (provides wait time between question and prompt)</li> </ul>                                                                                                                                                                                                                                                                                                                                                                                                                                                                               |                                                                                                                                                                                                                                                                                                                                                                                                                                                                                                                                                                                                                                                   |  |
| <p>Teaching<br/>(Quality of Majority)</p> <p><i>Appropriateness of Context &amp; Materials</i></p> | <ul style="list-style-type: none"> <li>• Implements in distraction-free setting.</li> <li>• Implements during time that is not rushed or under pressure.</li> <li>• Implements in a natural context (e.g., putting shoes on before time to go out).</li> <li>• Selects child's preferred materials while teaching skill (e.g., when teaching child to dress, uses favorite shirt).</li> </ul> <p><u>Reinforcer use</u> - Includes appropriate and consistent use of reinforcers.</p> <p><u>Incrementally adds prompts</u> as needed if child does not respond to parent's initial prompt.</p> | <p><u>Score of 0</u> = Did not meet criteria for 1 on <i>Teaching-Frequency</i> item</p> <p><u>Score of 1</u> =<br/>           Received 2 on Teaching-Frequency item AND 20-49% of prompts instances included some degree of increased supports <u>OR</u> praise/reinforcement<br/>           OR<br/>           Received 1 on Teaching-Frequency item AND 50+% of prompts instances included some degree of increased supports <u>OR</u> praise/reinforcement</p> <p><u>Score of 2</u> = Received 2 on Teaching-Frequency item <u>AND</u> 50+% of prompts instances included some degree of increased supports <u>OR</u> praise/reinforcement</p> |  |
