# Supplementary material
Source: publisher figshare collection journal article supplement (https://asha.figshare.com/articles/dataset/_/19528978)
Supplement: Supplementary file 2 [file 1]

# Parent Satisfaction Questionnaire

Please complete the survey below.

Thank you!

We wish to thank you for participating in this study. We are asking you to give us your opinion about your experiences in the Parent Training program. Please answer as honestly as possible. Your opinion is important to us. Please select only one answer for each question. Thank you for your input!

Date Parent Satisfaction Questionnaire was completed \_\_\_\_\_

Informant's relationship to child

- ☐ Mother  
☐ Father  
☐ Other

The number of training sessions/appointments was

- ☐ Too few  
☐ Just right  
☐ Too many

The length of training sessions/appointments was generally

- ☐ Too short  
☐ Just right  
☐ Too long

The materials presented by the clinician were generally

- ☐ Too easy  
☐ Just right  
☐ Too difficult

The videotape examples were generally

- ☐ Very helpful  
☐ Somewhat helpful  
☐ Not helpful

The handouts were generally

- ☐ Too easy  
☐ Just right  
☐ Too difficult

The session on behavioral principles (The ABCs) was

- ☐ Very helpful  
☐ Somewhat helpful  
☐ Not helpful

The sessions on prevention approaches and visual strategies were

- ☐ Very helpful  
☐ Somewhat helpful  
☐ Not helpful

The sessions on how to reward my child and when to pay attention to my child were

- ☐ Very helpful  
☐ Somewhat helpful  
☐ Not helpful

The session on the use of ignoring was

- ☐ Very helpful  
☐ Somewhat helpful  
☐ Not helpful

The session on teaching my child to listen or comply was

- ☐ Very helpful  
☐ Somewhat helpful  
☐ Not helpful

|                                                                                                                     |                                                                                                                                                                                                                                                                                                                |
|---------------------------------------------------------------------------------------------------------------------|----------------------------------------------------------------------------------------------------------------------------------------------------------------------------------------------------------------------------------------------------------------------------------------------------------------|
| The sessions on how to teach my child were                                                                          | <input type="radio"/> Very helpful<br><input type="radio"/> Somewhat helpful<br><input type="radio"/> Not helpful                                                                                                                                                                                              |
| The sessions on how to maintain and generalize my child's behavior change to other settings were                    | <input type="radio"/> Very helpful<br><input type="radio"/> Somewhat helpful<br><input type="radio"/> Not helpful                                                                                                                                                                                              |
| The home visits were                                                                                                | <input type="radio"/> Very helpful<br><input type="radio"/> Somewhat helpful<br><input type="radio"/> Not helpful                                                                                                                                                                                              |
| The behaviors targeted for change in this intervention for my child                                                 | <input type="radio"/> Have improved<br><input type="radio"/> Are about the same<br><input type="radio"/> Have worsened                                                                                                                                                                                         |
| Present level of confidence: My level of confidence in managing present behaviors is                                | <input type="radio"/> I am more confident since participating in this program<br><input type="radio"/> I am about the same as when I started this program<br><input type="radio"/> I am less confident than I had been                                                                                         |
| Level of confidence concerning new problem behaviors: In terms of managing future behavior issues,                  | <input type="radio"/> I am more confident since participating in this program<br><input type="radio"/> I am about the same as when I started this program<br><input type="radio"/> I am less confident than I had been                                                                                         |
| Would you say that you currently use behavior management principles for managing your child's behavior?             | <input type="radio"/> Yes<br><input type="radio"/> No                                                                                                                                                                                                                                                          |
| If YES, please indicate how regularly you apply these procedures (select one only):                                 | <input type="radio"/> I use the procedures some of the time<br><input type="radio"/> I use the procedures at a moderate level (much of the time)<br><input type="radio"/> I use the procedures most of the time<br><input type="radio"/> At least two adults in the family use the procedures most of the time |
| Would you recommend the Parent Training program to other parents who have a child with an autism spectrum disorder? | <input type="radio"/> Yes, definitely<br><input type="radio"/> Maybe, some reservations<br><input type="radio"/> No                                                                                                                                                                                            |
| Were there aspects of the parent training program that you especially liked or were particularly valuable?          | <input type="radio"/> Yes<br><input type="radio"/> No                                                                                                                                                                                                                                                          |
| If yes, please describe them here:                                                                                  | _____                                                                                                                                                                                                                                                                                                          |
| Were there aspects of the parent training program that you did not like?                                            | <input type="radio"/> Yes<br><input type="radio"/> No                                                                                                                                                                                                                                                          |
| If yes, please describe them here:                                                                                  | _____                                                                                                                                                                                                                                                                                                          |
| Additional Feedback and/or Comments about Intervention for Challenging Behaviors:                                   | _____                                                                                                                                                                                                                                                                                                          |

---

Which intervention program were you more satisfied with implementing: Communication or Challenging Behavior?

- ☐ More satisfied with Communication Intervention
- ☐ More satisfied with Challenging Behavior Intervention
- ☐ Equally satisfied with both intervention programs

---

Please explain:

\_\_\_\_\_

---

Which intervention program do you believe is a more effective approach for your child?

- ☐ Communication Intervention is more effective
- ☐ Challenging Behavior Intervention is more effective
- ☐ Both programs are equally effective

---

Please explain:

\_\_\_\_\_
